# Supplementary material for: Thermally stable nanosized LEV zeolites synthesized by hydrothermal conversion of FAU zeolites in the presence of N,N-dimethylpiperidinium cations
Source: Royal Society of Chemistry journal article supplement (doi:10.1039/c7ta04988a), 2017-01-01
Supplement: c7ta04988a1.pdf [file c7ta04988a1.pdf]

## **Supporting information:**

### **Thermally stable nanosized LEV zeolite synthesized by hydrothermal conversion of FAU zeolite in the presence of N,N-dimethylpiperidinium cation**

Natsumi Funase<sup>a</sup>, Takuya Tanigawa<sup>a</sup>, Yoshitaka Yamasaki<sup>a</sup>, Nao Tsunoji<sup>\*a</sup>, Masahiro

Sadakane<sup>a</sup>, and Tsuneji Sano<sup>\*a</sup>

<sup>a</sup>Department of Applied Chemistry, Graduate School of Engineering, Hiroshima University, Higashi-

Hiroshima 739-8527, Japan

#### **Corresponding Author**

\*Corresponding authors: Nao Tsunoji, tel.: +81-82-424-7606, e-mail: [tnao7373@hiroshima-u.ac.jp](mailto:tnao7373@hiroshima-u.ac.jp); Tsuneji Sano, tel.: +81-82-424-7607, e-mail: [tsano@hiroshima-u.ac.jp](mailto:tsano@hiroshima-u.ac.jp)

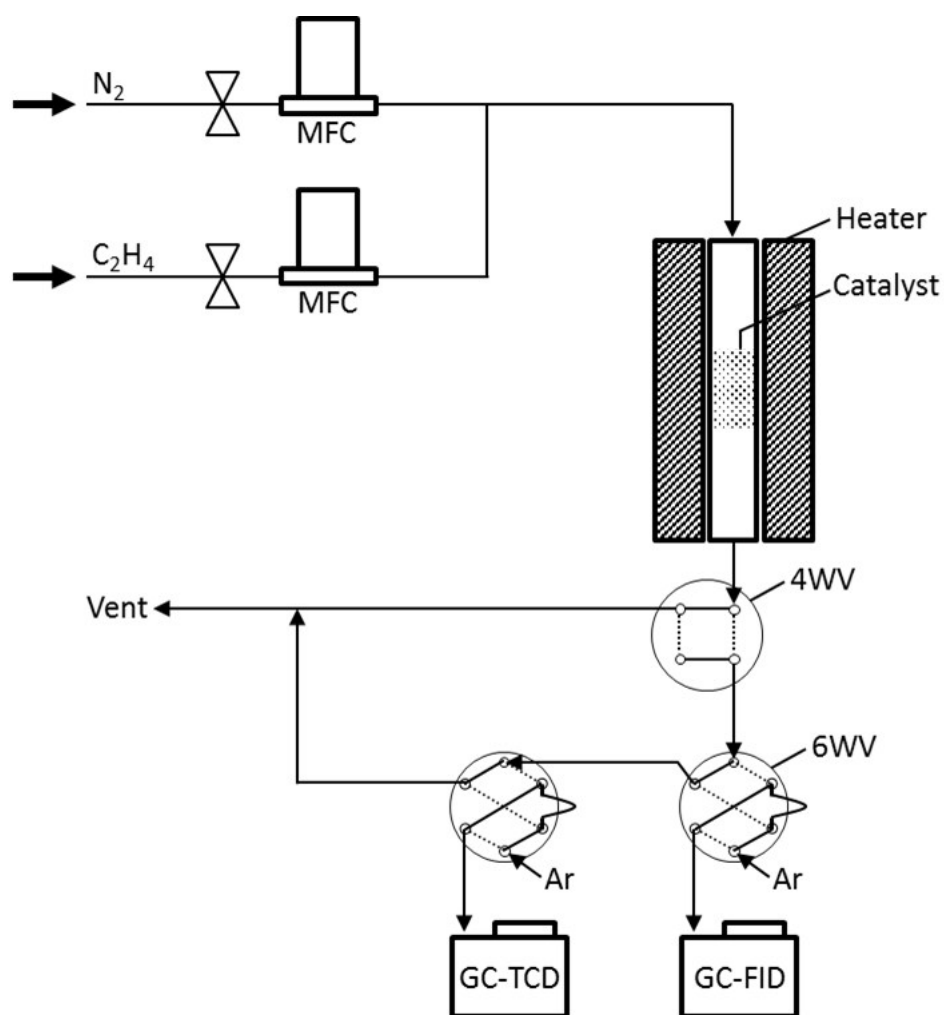

**Figure S1.** Illustration of setup of fixed-bed flow reactor for ethylene conversion. MFC, 4WV, 6WV, GC-FID, and GC-TCD indicate mass flow controller, four-way valve, six-way valve, gas chromatography with thermal conductivity detector, and gas chromatography with flame ionization detector, respectively.

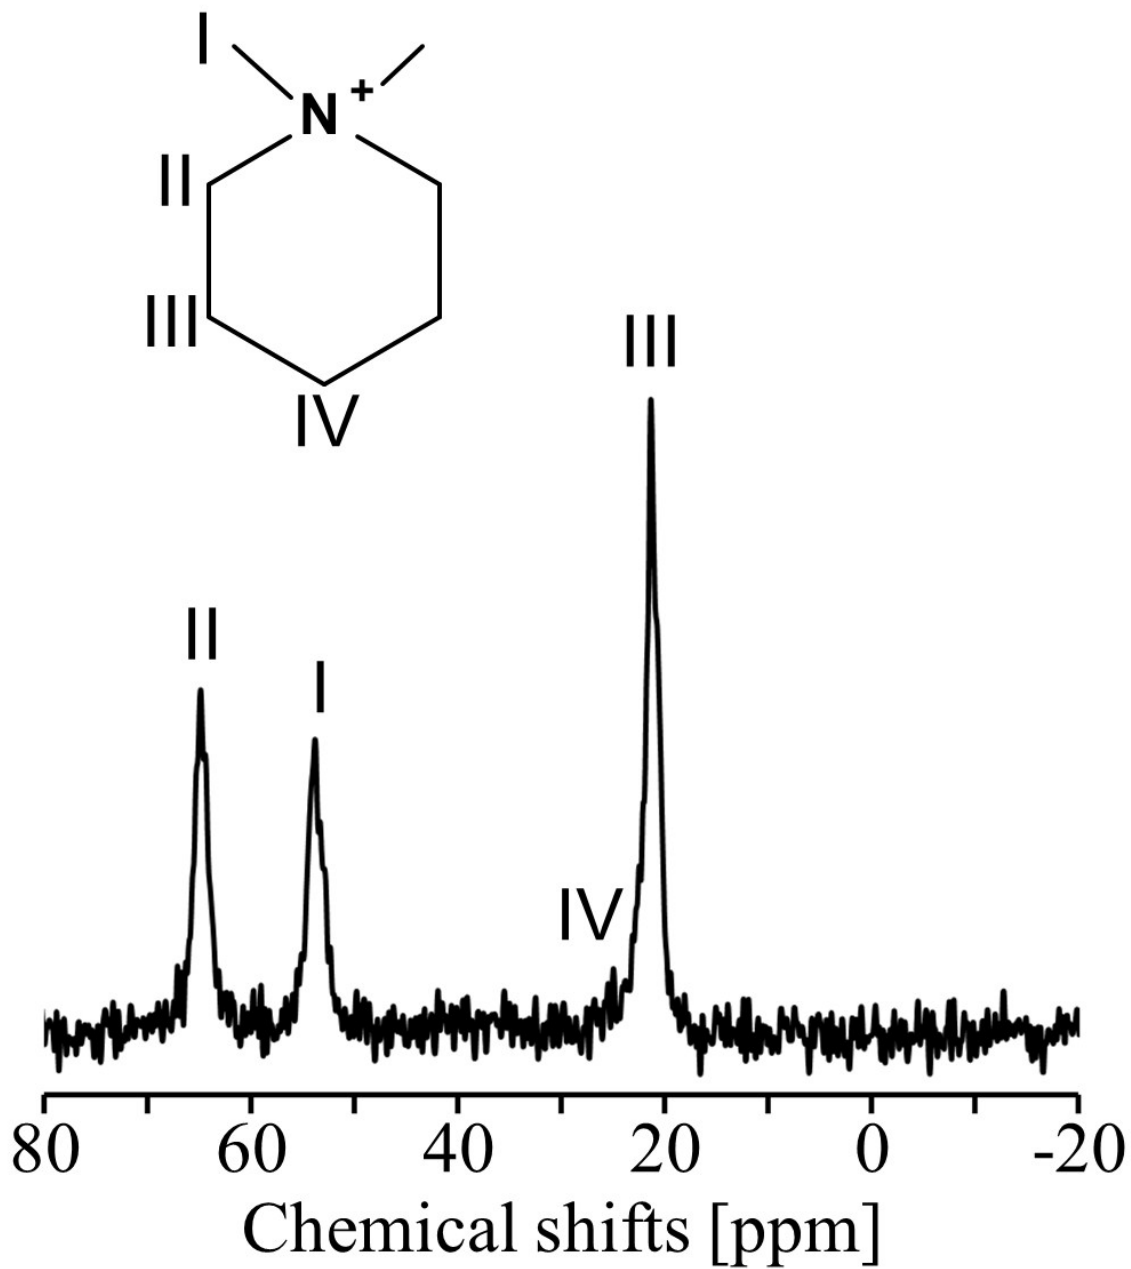

**Figure S2.** <sup>13</sup>C CP MAS NMR spectrum of as-synthesized LEV zeolite obtained from FAU zeolite in the presence of DMPOH (sample no. 5).

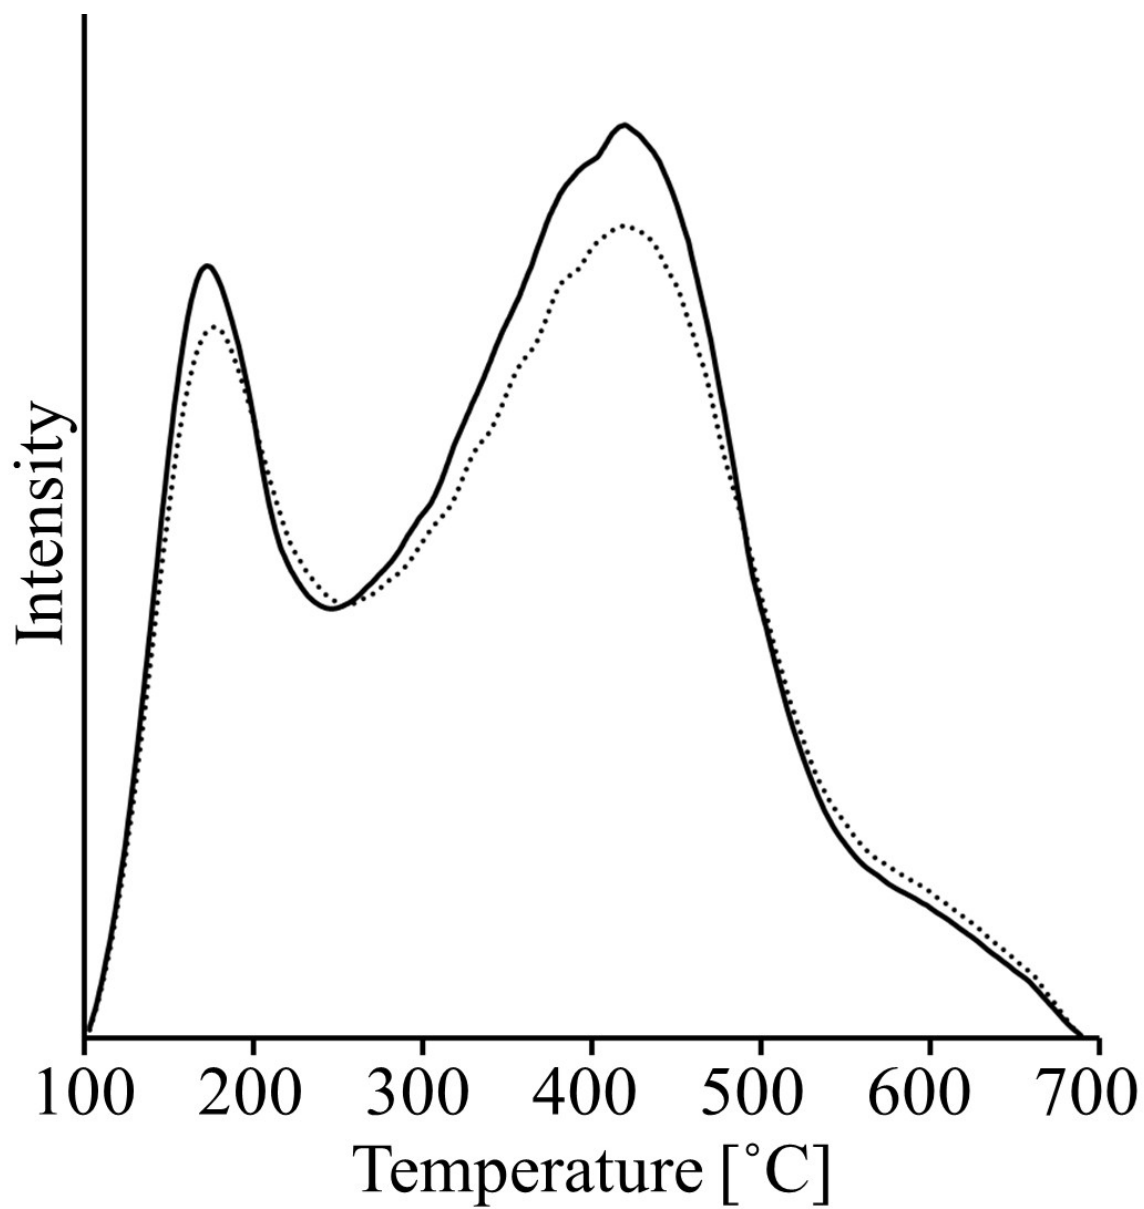

**Figure S3.** NH<sub>3</sub>-TPD curves of LEV zeolites (H-form) obtained from FAU zeolite in the presence of (solid line) DMPDH (sample no. 5) and (dotted line) cholineOH (sample no. 11).

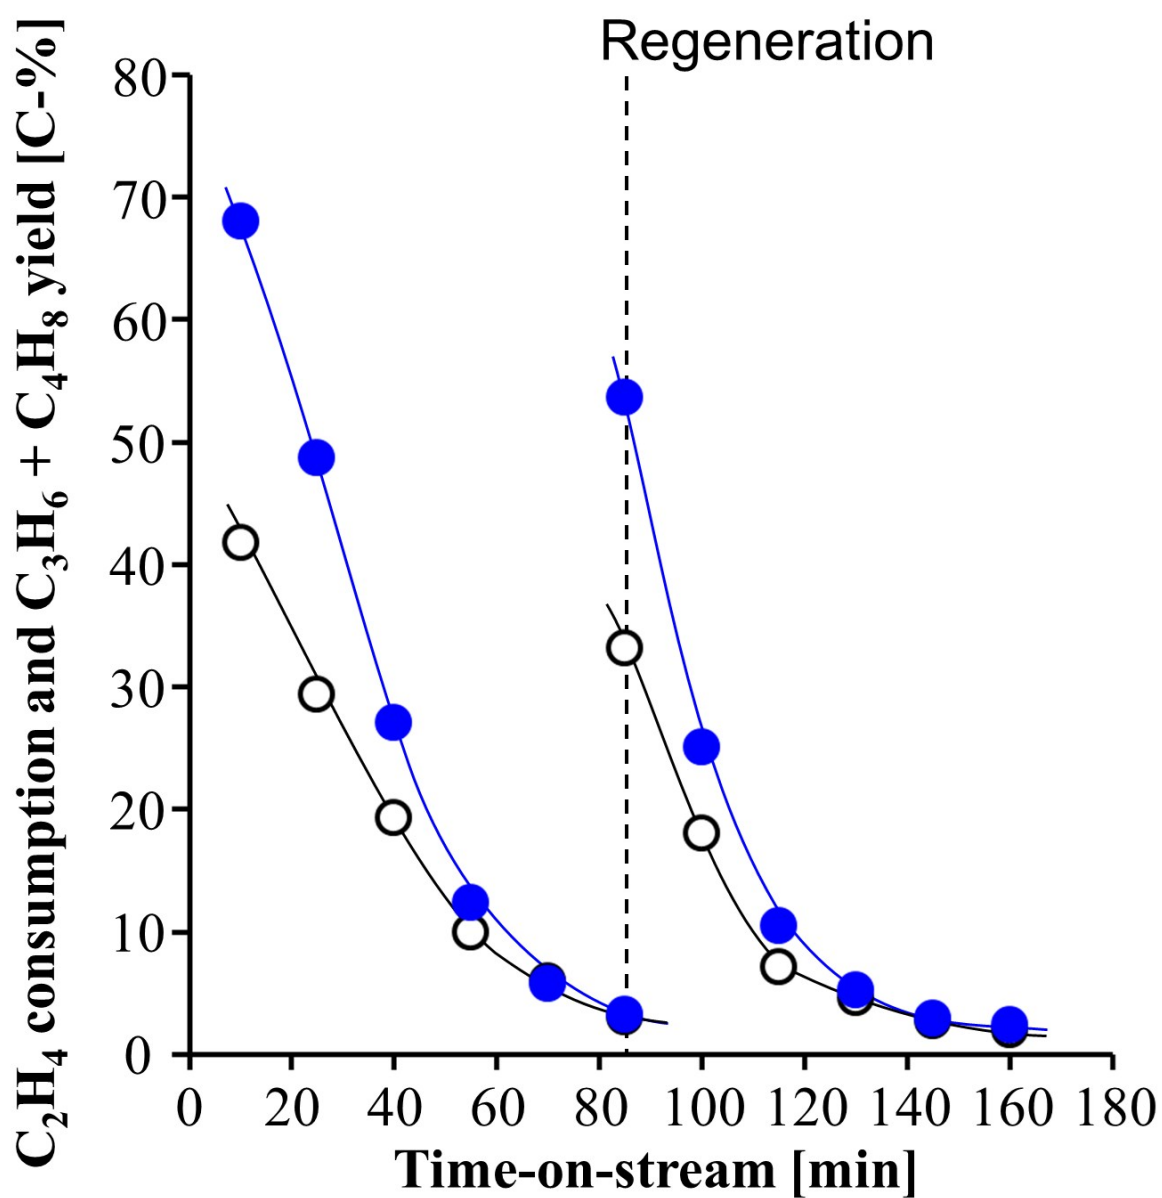

**Figure S4.** Time-on-stream of (●)  $C_2H_4$  consumption and (○)  $C_3H_6 + C_4H_8$  yield for ethylene conversion over nanosized LEV zeolite (H-form) obtained from FAU zeolite in the presence of DMPOH through catalyst regeneration (calcination at 500 °C for 10h).
